# Supplementary material for: Magnesium Hydroxide Nanoparticles Improve the Ocular Hypotensive Effect of Twice Daily Topical Timolol Maleate in Healthy Dogs
Source: MDPI journal article supplement (doi:10.3390/vetsci8080168), 2021-08-23
Supplement: s1 [file s1]

**Table S1.** Particle size distribution of 0.02% and 0.2% nMH.

|           | D10 (nm) | D50 (nm) | D90 (nm) |
|-----------|----------|----------|----------|
| 0.02% nMH | 66       | 98       | 178      |
| 0.2% nMH  | 61       | 101      | 172      |

D10, 50, and 90; The portion of particles with diameters smaller than this value is 10% , 50%, and 90%, respectively.
